# Supplementary material for: 6-Methoxyflavanones as Bitter Taste Receptor Blockers for hTAS2R39
Source: PLOS journal article supplement (doi:10.1371/journal.pone.0094451), 2014-04-10
Supplement: S2 (10.1371/journal.pone.0094451.s002) [file journal.pone.0094451.s002]

**File S2** Test for toxic effects.

Compounds were tested for toxic effects on the cells by means of dye exclusion tests. The experiments were conducted as described in Roland et al., *J. Agric. Food Chem.* 2011, 59, 11764-11771. The results are shown in **Figure S2**. No toxic effects on the cells were observed.

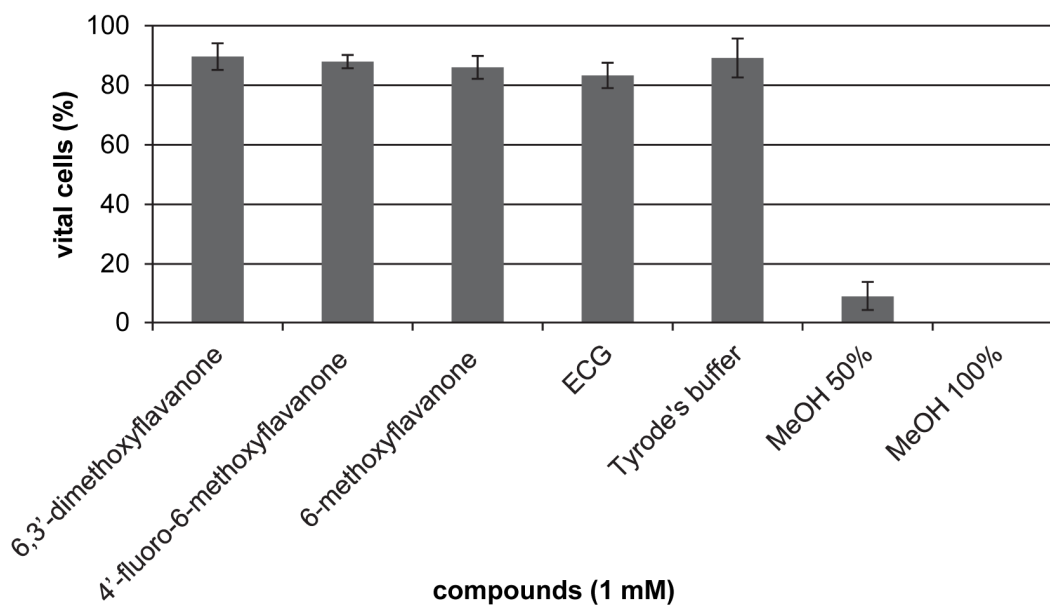

**Figure S2.** Cell viability after 2 min incubation with antagonists, ECG, Tyrode's buffer (negative control for toxicity), and methanol (positive control for toxicity).
